# Supplementary material for: Pure and Hybrid SCAN, rSCAN, and r2SCAN: Which One Is Preferred in KS- and HF-DFT Calculations, and How Does D4 Dispersion Correction Affect This Ranking?
Source: MDPI journal article supplement (doi:10.3390/molecules27010141), 2021-12-27
Supplement: s1 [file s1]

Electronic Supporting Information  
for

**Pure and hybrid SCAN, rSCAN, and r2SCAN: which one is preferred in KS- and HF-DFT calculations, and how does D4 dispersion correction affect this ranking?**

*Golokesh Santra\* and Jan M.L. Martin*

Department of Molecular Chemistry and Materials Science, Weizmann Institute of Science, 7610001  
Rehovot, Israel.

Correspondence: [golokesh.santra@weizmann.ac.il](mailto:golokesh.santra@weizmann.ac.il)

Table S1: Original and optimized D4 parameters, total WTMAD2 (kcal/mol), as well as its decomposition into the five major subsets for HF-DFT and self-consistent functionals.

| Functionals                              | S <sub>6</sub> | S <sub>8</sub> | C <sub>ATM</sub> | a <sub>1</sub> | a <sub>2</sub> | WTMAD2 | THERMO <sup>a</sup> | BARRIER <sup>b</sup> | LARGE <sup>c</sup> | CONF <sup>d</sup> | INTERMOL <sup>e</sup> |
|------------------------------------------|----------------|----------------|------------------|----------------|----------------|--------|---------------------|----------------------|--------------------|-------------------|-----------------------|
| HF-SCAN-D4                               | 1.0            | 0.6726         | 1.0              | 0.1654         | 7.3664         | 5.05   | 1.286               | 1.040                | 1.080              | 0.890             | 0.757                 |
| HF-SCAN <sub>10</sub> -D4                | 1.0            | 1.0159         | 1.0              | 0.2161         | 7.3021         | 4.96   | 1.334               | 0.898                | 1.059              | 0.905             | 0.764                 |
| HF-SCAN0-D4                              | 1.0            | 1.0482         | 1.0              | 0.2290         | 7.2144         | 5.17   | 1.509               | 0.786                | 1.141              | 0.949             | 0.787                 |
| HF-SCAN <sub>38</sub> -D4                | 1.0            | 0.8788         | 1.0              | 0.2493         | 6.9488         | 5.58   | 1.702               | 0.767                | 1.254              | 1.008             | 0.849                 |
| HF-SCAN <sub>50</sub> -D4                | 1.0            | 0.5959         | 1.0              | 0.2810         | 6.4527         | 6.18   | 1.947               | 0.849                | 1.374              | 1.067             | 0.943                 |
| SCAN-D4orig[1,2]                         | 1.0            | 1.4613         | 1.0              | 0.6293         | 6.3128         | 7.87   | 1.682               | 1.900                | 1.347              | 1.237             | 1.708                 |
| SCAN-D4                                  | 1.0            | 3.6151         | 1.0              | 0.2044         | 9.0611         | 7.75   | 1.681               | 1.895                | 1.360              | 1.227             | 1.592                 |
| SCAN <sub>10</sub> -D4                   | 1.0            | 6.4925         | 1.0              | 0.3149         | 8.7697         | 6.79   | 1.531               | 1.510                | 1.228              | 1.105             | 1.419                 |
| SCAN0-D4                                 | 1.0            | 6.1187         | 1.0              | 0.3750         | 8.1124         | 5.98   | 1.549               | 1.040                | 1.192              | 1.001             | 1.198                 |
| SCAN <sub>38</sub> -D4                   | 1.0            | 5.0438         | 1.0              | 0.3996         | 7.6249         | 5.79   | 1.691               | 0.768                | 1.256              | 0.997             | 1.075                 |
| SCAN <sub>50</sub> -D4                   | 1.0            | 3.2856         | 1.0              | 0.4108         | 6.9783         | 6.14   | 1.901               | 0.754                | 1.377              | 1.055             | 1.051                 |
| HF-rSCAN-D4                              | 1.0            | 0.2691         | 1.0              | 0.2634         | 5.7949         | 5.25   | 1.323               | 1.098                | 1.083              | 0.893             | 0.848                 |
| HF-rSCAN <sub>10</sub> -D4               | 1.0            | 0.3824         | 1.0              | 0.2672         | 5.9709         | 5.04   | 1.391               | 0.950                | 0.946              | 0.914             | 0.836                 |
| HF-rSCAN0-D4                             | 1.0            | 0.1534         | 1.0              | 0.2400         | 5.8491         | 5.16   | 1.573               | 0.860                | 0.942              | 0.895             | 0.895                 |
| HF-rSCAN <sub>38</sub> -D4               | 1.0            | 0.1986         | 1.0              | 0.2425         | 6.0003         | 5.60   | 1.776               | 0.842                | 1.078              | 0.968             | 0.938                 |
| HF-rSCAN <sub>50</sub> -D4               | 1.0            | 0.2520         | 1.0              | 0.2867         | 5.8287         | 6.24   | 2.035               | 0.895                | 1.248              | 1.049             | 1.015                 |
| rSCAN-D4orig[3]                          | 1.0            | 0.8773         | 1.0              | 0.4911         | 5.7586         | 7.57   | 1.649               | 1.889                | 1.423              | 1.196             | 1.418                 |
| rSCAN-D4                                 | 1.0            | 3.6523         | 1.0              | 0.3926         | 7.2936         | 7.46   | 1.647               | 1.873                | 1.419              | 1.189             | 1.337                 |
| rSCAN <sub>10</sub> -D4                  | 1.0            | 3.3927         | 1.0              | 0.4012         | 7.0515         | 6.43   | 1.483               | 1.505                | 1.163              | 1.058             | 1.217                 |
| rSCAN0-D4                                | 1.0            | 2.9139         | 1.0              | 0.4131         | 6.7174         | 5.71   | 1.537               | 1.044                | 1.035              | 0.982             | 1.111                 |
| rSCAN <sub>38</sub> -D4                  | 1.0            | 2.4737         | 1.0              | 0.4170         | 6.4918         | 5.68   | 1.721               | 0.798                | 1.098              | 0.991             | 1.077                 |
| rSCAN <sub>50</sub> -D4                  | 1.0            | 1.7038         | 1.0              | 0.4161         | 6.1499         | 6.15   | 1.969               | 0.792                | 1.235              | 1.061             | 1.097                 |
| HF-r <sup>2</sup> SCAN-D4                | 1.0            | 0.1596         | 1.0              | 0.0915         | 6.8013         | 5.01   | 1.290               | 1.014                | 0.969              | 0.986             | 0.753                 |
| HF-r <sup>2</sup> SCAN <sub>10</sub> -D4 | 1.0            | 0.0364         | 1.0              | 0.1074         | 6.4775         | 4.85   | 1.376               | 0.901                | 0.898              | 0.920             | 0.750                 |
| HF-r <sup>2</sup> SCAN0-D4               | 1.0            | 0.0765         | 1.0              | 0.1529         | 6.3025         | 5.07   | 1.572               | 0.818                | 0.977              | 0.914             | 0.792                 |
| HF-r <sup>2</sup> SCAN <sub>38</sub> -D4 | 1.0            | 0.0827         | 1.0              | 0.1695         | 6.3400         | 5.54   | 1.782               | 0.816                | 1.121              | 0.975             | 0.845                 |
| HF-r <sup>2</sup> SCAN <sub>50</sub> -D4 | 1.0            | 0.1265         | 1.0              | 0.1891         | 6.2827         | 6.20   | 2.047               | 0.885                | 1.284              | 1.049             | 0.934                 |
| r <sup>2</sup> SCAN-D4orig[3]            | 1.0            | 0.6019         | 1.0              | 0.5156         | 5.7734         | 7.23   | 1.552               | 1.809                | 1.314              | 1.123             | 1.427                 |
| r <sup>2</sup> SCAN-D4                   | 1.0            | 2.9784         | 1.0              | 0.2428         | 8.2088         | 7.02   | 1.554               | 1.793                | 1.355              | 1.087             | 1.235                 |
| r <sup>2</sup> SCAN <sub>10</sub> -D4    | 1.0            | 3.1930         | 1.0              | 0.2825         | 7.8993         | 6.10   | 1.450               | 1.433                | 1.172              | 0.953             | 1.095                 |
| r <sup>2</sup> SCAN0-D4                  | 1.0            | 3.1720         | 1.0              | 0.3221         | 7.4820         | 5.42   | 1.540               | 0.983                | 1.062              | 0.883             | 0.956                 |
| r <sup>2</sup> SCAN <sub>38</sub> -D4    | 1.0            | 2.5473         | 1.0              | 0.3396         | 7.0745         | 5.43   | 1.725               | 0.755                | 1.125              | 0.918             | 0.912                 |
| r <sup>2</sup> SCAN <sub>50</sub> -D4    | 1.0            | 1.7036         | 1.0              | 0.3559         | 6.5555         | 6.00   | 1.980               | 0.777                | 1.261              | 1.021             | 0.963                 |

<sup>a</sup>THERMO=Small Molecule Thermochemistry; <sup>b</sup>BARRIER=barrier heights; <sup>c</sup>LARGE=reaction energies for large systems; <sup>d</sup>CONF=conformer/intramolecular interactions; and <sup>e</sup>INTERMOL=intermolecular interactions

Table S2: Total WTMAD2 (kcal/mol) and its decomposition into the five major subsets for dispersion uncorrected HF-DFT and self-consistent functionals.

| Functionals                          | Densities | THERMO <sup>a</sup> | BARRIER <sup>b</sup> | LARGE <sup>c</sup> | CONF <sup>d</sup> | INTERMOL <sup>e</sup> | WTMAD2 |
|--------------------------------------|-----------|---------------------|----------------------|--------------------|-------------------|-----------------------|--------|
| HF-SCAN                              | UHF       | 1.287               | 0.983                | 1.288              | 1.869             | 2.014                 | 7.44   |
| HF-SCAN                              | ROHF      | 1.297               | 0.967                | 1.231              | 1.869             | 2.014                 | 7.38   |
| HF-SCAN <sub>10</sub>                | UHF       | 1.331               | 0.846                | 1.252              | 1.930             | 2.019                 | 7.38   |
| HF-SCAN0                             | UHF       | 1.496               | 0.739                | 1.304              | 2.041             | 2.060                 | 7.64   |
| HF-SCAN0                             | ROHF      | 1.348               | 0.739                | 1.310              | 2.041             | 2.060                 | 7.50   |
| HF-SCAN <sub>38</sub>                | UHF       | 1.683               | 0.738                | 1.403              | 2.153             | 2.116                 | 8.09   |
| HF-SCAN <sub>50</sub>                | UHF       | 1.920               | 0.859                | 1.529              | 2.273             | 2.192                 | 8.77   |
| SCAN                                 | UKS       | 1.674               | 1.865                | 1.481              | 1.576             | 2.169                 | 8.77   |
| SCAN                                 | ROKS      | 1.732               | 1.749                | 1.452              | 1.580             | 2.173                 | 8.69   |
| SCAN <sub>10</sub>                   | UKS       | 1.522               | 1.476                | 1.357              | 1.598             | 2.098                 | 8.05   |
| SCAN0                                | UKS       | 1.540               | 0.995                | 1.322              | 1.668             | 2.020                 | 7.55   |
| SCAN0                                | ROKS      | 1.351               | 0.812                | 1.254              | 1.673             | 2.026                 | 7.12   |
| SCAN <sub>38</sub>                   | UKS       | 1.672               | 0.734                | 1.391              | 1.815             | 2.048                 | 7.66   |
| SCAN <sub>50</sub>                   | UKS       | 1.875               | 0.762                | 1.516              | 2.030             | 2.134                 | 8.32   |
| HF-rSCAN                             | UHF       | 1.339               | 0.990                | 1.271              | 2.463             | 2.925                 | 8.99   |
| HF-rSCAN                             | ROHF      | 1.383               | 0.995                | 1.201              | 2.463             | 2.9254                | 8.97   |
| HF-rSCAN <sub>10</sub>               | UHF       | 1.393               | 0.861                | 1.219              | 2.470             | 2.817                 | 8.76   |
| HF-rSCAN0                            | UHF       | 1.555               | 0.786                | 1.236              | 2.473             | 2.650                 | 8.70   |
| HF-rSCAN0                            | ROHF      | 1.420               | 0.743                | 1.214              | 2.473             | 2.650                 | 8.50   |
| HF-rSCAN <sub>38</sub>               | UHF       | 1.745               | 0.808                | 1.305              | 2.494             | 2.544                 | 8.90   |
| HF-rSCAN <sub>50</sub>               | UHF       | 1.997               | 0.915                | 1.444              | 2.531             | 2.483                 | 9.37   |
| rSCAN                                | UKS       | 1.647               | 1.817                | 1.535              | 1.883             | 2.400                 | 9.28   |
| rSCAN                                | ROKS      | 1.698               | 1.726                | 1.531              | 1.883             | 2.4001                | 9.24   |
| rSCAN <sub>10</sub>                  | UKS       | 1.477               | 1.442                | 1.373              | 1.892             | 2.377                 | 8.56   |
| rSCAN0                               | UKS       | 1.519               | 0.984                | 1.270              | 1.981             | 2.353                 | 8.11   |
| rSCAN0                               | ROKS      | 1.347               | 0.817                | 1.222              | 1.981             | 2.353                 | 7.72   |
| rSCAN <sub>38</sub>                  | UKS       | 1.688               | 0.767                | 1.298              | 2.121             | 2.365                 | 8.24   |
| rSCAN <sub>50</sub>                  | UKS       | 1.932               | 0.818                | 1.416              | 2.277             | 2.388                 | 8.83   |
| HF-r <sup>2</sup> SCAN               | UHF       | 1.316               | 0.923                | 1.310              | 2.247             | 2.613                 | 8.41   |
| HF-r <sup>2</sup> SCAN               | ROHF      | 1.276               | 0.922                | 1.240              | 2.247             | 2.613                 | 8.30   |
| HF-r <sup>2</sup> SCAN <sub>10</sub> | UHF       | 1.380               | 0.807                | 1.248              | 2.279             | 2.549                 | 8.26   |
| HF-r <sup>2</sup> SCAN0              | UHF       | 1.559               | 0.747                | 1.265              | 2.324             | 2.451                 | 8.35   |
| HF-r <sup>2</sup> SCAN0              | ROHF      | 1.402               | 0.705                | 1.245              | 2.324             | 2.451                 | 8.13   |
| HF-r <sup>2</sup> SCAN <sub>38</sub> | UHF       | 1.754               | 0.782                | 1.343              | 2.373             | 2.402                 | 8.65   |
| HF-r <sup>2</sup> SCAN <sub>50</sub> | UHF       | 2.011               | 0.907                | 1.481              | 2.445             | 2.390                 | 9.23   |
| r <sup>2</sup> SCAN                  | UKS       | 1.559               | 1.749                | 1.536              | 1.618             | 2.207                 | 8.67   |
| r <sup>2</sup> SCAN                  | ROKS      | 1.549               | 1.653                | 1.528              | 1.618             | 2.207                 | 8.55   |
| r <sup>2</sup> SCAN <sub>10</sub>    | UKS       | 1.452               | 1.383                | 1.369              | 1.655             | 2.152                 | 8.01   |
| r <sup>2</sup> SCAN0                 | UKS       | 1.530               | 0.934                | 1.266              | 1.797             | 2.129                 | 7.65   |
| r <sup>2</sup> SCAN0                 | ROKS      | 1.315               | 0.758                | 1.236              | 1.786             | 2.116                 | 7.21   |
| r <sup>2</sup> SCAN <sub>38</sub>    | UKS       | 1.698               | 0.728                | 1.309              | 1.985             | 2.195                 | 7.92   |
| r <sup>2</sup> SCAN <sub>50</sub>    | UKS       | 1.946               | 0.802                | 1.431              | 2.183             | 2.278                 | 8.64   |

<sup>a</sup>THERMO=Small Molecule Thermochemistry; <sup>b</sup>BARRIER=barrier heights; <sup>c</sup>LARGE=reaction energies for large systems; <sup>d</sup>CONF=conformer/intramolecular interactions; and <sup>e</sup>INTERMOL=intermolecular interactions

Table S3: MAD and MSD (mean absolute and mean signed deviations, kcal/mol) of dispersion-uncorrected HF-DFT and KS-DFT functionals for the S66 subset, and the four subcategories of S66.

| Functionals                          | MAD (kcal/mol) |              |        |                 |         | MSD (kcal/mol) |              |        |                 |          |
|--------------------------------------|----------------|--------------|--------|-----------------|---------|----------------|--------------|--------|-----------------|----------|
|                                      | H-bonds        | $\pi$ -stack | London | Mixed-influence | Ful S66 | H-bonds        | $\pi$ -stack | London | Mixed-influence | Full S66 |
| HF-SCAN                              | 0.51           | 1.38         | 2.06   | 0.94            | 1.08    | -0.45          | -1.38        | -2.06  | -0.94           | -1.06    |
| HF-SCAN <sub>10</sub>                | 0.43           | 1.52         | 2.06   | 0.91            | 1.06    | -0.32          | -1.52        | -2.06  | -0.90           | -1.02    |
| HF-SCAN0                             | 0.39           | 1.75         | 2.08   | 0.91            | 1.09    | -0.15          | -1.75        | -2.08  | -0.88           | -0.99    |
| HF-SCAN <sub>38</sub>                | 0.42           | 1.94         | 2.09   | 0.91            | 1.13    | -0.01          | -1.94        | -2.09  | -0.87           | -0.97    |
| HF-SCAN <sub>50</sub>                | 0.49           | 2.13         | 2.11   | 0.92            | 1.19    | 0.13           | -2.13        | -2.11  | -0.85           | -0.95    |
| SCAN                                 | 0.57           | 1.24         | 1.45   | 0.71            | 0.89    | 0.40           | -1.24        | -1.45  | -0.62           | -0.53    |
| SCAN <sub>10</sub>                   | 0.57           | 1.44         | 1.56   | 0.74            | 0.95    | 0.38           | -1.44        | -1.56  | -0.66           | -0.59    |
| SCAN0                                | 0.57           | 1.73         | 1.72   | 0.80            | 1.04    | 0.36           | -1.73        | -1.72  | -0.72           | -0.70    |
| SCAN <sub>38</sub>                   | 0.59           | 1.96         | 1.83   | 0.84            | 1.12    | 0.36           | -1.96        | -1.83  | -0.76           | -0.76    |
| SCAN <sub>50</sub>                   | 0.63           | 2.18         | 1.93   | 0.88            | 1.20    | 0.38           | -2.18        | -1.93  | -0.79           | -0.82    |
| HF-rSCAN                             | 0.84           | 2.26         | 2.43   | 1.36            | 1.52    | -0.84          | -2.26        | -2.43  | -1.36           | -1.52    |
| HF-rSCAN <sub>10</sub>               | 0.67           | 2.30         | 2.40   | 1.29            | 1.45    | -0.67          | -2.30        | -2.40  | -1.29           | -1.45    |
| HF-rSCAN0                            | 0.48           | 2.37         | 2.35   | 1.19            | 1.35    | -0.42          | -2.37        | -2.35  | -1.19           | -1.33    |
| HF-rSCAN <sub>38</sub>               | 0.41           | 2.43         | 2.30   | 1.12            | 1.30    | -0.22          | -2.43        | -2.30  | -1.11           | -1.23    |
| HF-rSCAN <sub>50</sub>               | 0.44           | 2.49         | 2.26   | 1.06            | 1.30    | -0.01          | -2.49        | -2.26  | -1.02           | -1.14    |
| rSCAN                                | 0.38           | 2.16         | 1.89   | 1.05            | 1.15    | 0.01           | -2.16        | -1.89  | -1.05           | -1.01    |
| rSCAN <sub>10</sub>                  | 0.39           | 2.25         | 1.95   | 1.05            | 1.18    | 0.02           | -2.25        | -1.95  | -1.05           | -1.04    |
| rSCAN0                               | 0.42           | 2.39         | 2.02   | 1.05            | 1.22    | 0.08           | -2.39        | -2.02  | -1.03           | -1.05    |
| rSCAN <sub>38</sub>                  | 0.48           | 2.48         | 2.07   | 1.04            | 1.27    | 0.15           | -2.48        | -2.07  | -1.01           | -1.04    |
| rSCAN <sub>50</sub>                  | 0.55           | 2.51         | 2.10   | 1.03            | 1.30    | 0.24           | -2.51        | -2.10  | -0.97           | -0.97    |
| HF-r <sup>2</sup> SCAN               | 0.83           | 1.73         | 2.32   | 1.16            | 1.36    | -0.83          | -1.73        | -2.32  | -1.16           | -1.36    |
| HF-r <sup>2</sup> SCAN <sub>10</sub> | 0.68           | 1.84         | 2.30   | 1.12            | 1.31    | -0.68          | -1.84        | -2.30  | -1.12           | -1.31    |
| HF-r <sup>2</sup> SCAN0              | 0.49           | 2.01         | 2.27   | 1.06            | 1.25    | -0.44          | -2.01        | -2.27  | -1.06           | -1.23    |
| HF-r <sup>2</sup> SCAN <sub>38</sub> | 0.41           | 2.15         | 2.25   | 1.02            | 1.22    | -0.24          | -2.15        | -2.25  | -1.01           | -1.16    |
| HF-r <sup>2</sup> SCAN <sub>50</sub> | 0.43           | 2.28         | 2.23   | 1.00            | 1.24    | -0.05          | -2.28        | -2.23  | -0.96           | -1.09    |
| r <sup>2</sup> SCAN                  | 0.37           | 1.67         | 1.78   | 0.89            | 1.00    | -0.01          | -1.67        | -1.78  | -0.88           | -0.87    |
| r <sup>2</sup> SCAN <sub>10</sub>    | 0.37           | 1.82         | 1.86   | 0.92            | 1.05    | 0.00           | -1.82        | -1.86  | -0.90           | -0.91    |
| r <sup>2</sup> SCAN0                 | 0.40           | 1.85         | 1.96   | 0.95            | 1.09    | 0.05           | -1.65        | -1.96  | -0.92           | -0.90    |
| r <sup>2</sup> SCAN <sub>38</sub>    | 0.46           | 2.21         | 2.02   | 0.96            | 1.18    | 0.11           | -2.21        | -2.02  | -0.92           | -0.97    |
| r <sup>2</sup> SCAN <sub>50</sub>    | 0.52           | 2.37         | 2.08   | 1.02            | 1.26    | 0.20           | -2.37        | -2.08  | -0.86           | -0.96    |

Table S4: Effect of using ROHF and ROKS densities instead of UHF and UKS ones for HF-DFT and self-consistent pure mGGA and hybrid functionals. Green means improvement and red means deterioration of performance.

| Subsets   | $\Delta$<br>WTMAD2 | $\Delta$<br>WTMAD2 | $\Delta\Delta$<br>WTMAD2 |
|-----------|--------------------|--------------------|--------------------------|--------------------|--------------------|--------------------------|--------------------|--------------------|--------------------------|--------------------|--------------------|--------------------------|
|           | ROHF               | UHF                |                          | ROHF               | UHF                |                          | ROKS               | UKS                |                          | ROKS               | UKS                |                          |
|           | HF-r2SCAN          |                    |                          | HF-r2SCAN0         |                    |                          | r2SCAN             |                    |                          | r2SCAN0            |                    |                          |
| ALKBDE10  | 0.0163             | 0.0181             | -0.002                   | 0.0255             | 0.0316             | -0.006                   | 0.0198             | 0.0191             | 0.001                    | 0.023              | 0.0272             | -0.004                   |
| BH76RC    | 0.1287             | 0.1482             | -0.020                   | 0.1243             | 0.1631             | -0.039                   | 0.1498             | 0.1657             | -0.016                   | 0.126              | 0.1558             | -0.030                   |
| BH76      | 0.4292             | 0.4305             | -0.001                   | 0.3701             | 0.4121             | -0.042                   | 1.0144             | 1.1112             | -0.097                   | 0.3719             | 0.5418             | -0.170                   |
| DC13      | 0.0823             | 0.0805             | 0.002                    | 0.078              | 0.0826             | -0.005                   | 0.0712             | 0.0772             | -0.006                   | 0.066              | 0.0751             | -0.009                   |
| G21EA     | 0.1044             | 0.1292             | -0.025                   | 0.1277             | 0.1598             | -0.032                   | 0.087              | 0.1082             | -0.021                   | 0.1143             | 0.1402             | -0.026                   |
| G21IP     | 0.021              | 0.0236             | -0.003                   | 0.0217             | 0.0254             | -0.004                   | 0.0209             | 0.0246             | -0.004                   | 0.0206             | 0.0253             | -0.005                   |
| HEAVYSB11 | 0.0219             | 0.04               | -0.018                   | 0.0261             | 0.0492             | -0.023                   | 0.0244             | 0.0284             | -0.004                   | 0.0199             | 0.0422             | -0.022                   |
| INV24     | 0.0392             | 0.039              | 0.000                    | 0.0487             | 0.0487             | 0.000                    | 0.034              | 0.034              | 0.000                    | 0.0427             | 0.0427             | 0.000                    |
| MB16-43   | 0.0384             | 0.0356             | 0.003                    | 0.0428             | 0.0479             | -0.005                   | 0.043              | 0.0442             | -0.001                   | 0.0475             | 0.0482             | -0.001                   |
| RC21      | 0.0792             | 0.0584             | 0.021                    | 0.075              | 0.0519             | 0.023                    | 0.1095             | 0.1039             | 0.006                    | 0.0894             | 0.0911             | -0.002                   |
| RSE43     | 0.1334             | 0.2063             | -0.073                   | 0.1555             | 0.1704             | -0.015                   | 0.3259             | 0.3323             | -0.006                   | 0.1326             | 0.1697             | -0.037                   |
| SIE4X4    | 0.2995             | 0.2203             | 0.079                    | 0.1657             | 0.1452             | 0.021                    | 0.3204             | 0.3247             | -0.004                   | 0.1766             | 0.1953             | -0.019                   |
| W4-11     | 0.0581             | 0.1179             | -0.060                   | 0.2002             | 0.276              | -0.076                   | 0.1127             | 0.0666             | 0.046                    | 0.127              | 0.1995             | -0.073                   |
| YBDE18    | 0.0383             | 0.0535             | -0.015                   | 0.0531             | 0.069              | -0.016                   | 0.0447             | 0.0528             | -0.008                   | 0.0383             | 0.0545             | -0.016                   |
|           | HF-rSCAN           |                    |                          | HF-rSCAN0          |                    |                          | rSCAN              |                    |                          | rSCAN0             |                    |                          |
| ALKBDE10  | 0.016              | 0.0162             | 0.000                    | 0.0201             | 0.0258             | -0.006                   | 0.0252             | 0.0209             | 0.004                    | 0.019              | 0.0232             | -0.004                   |
| BH76RC    | 0.1456             | 0.1558             | -0.010                   | 0.1268             | 0.1571             | -0.030                   | 0.1708             | 0.1727             | -0.002                   | 0.1303             | 0.1525             | -0.022                   |
| BH76      | 0.4695             | 0.465              | 0.004                    | 0.3877             | 0.4302             | -0.043                   | 1.0628             | 1.1538             | -0.091                   | 0.4108             | 0.5775             | -0.167                   |
| DC13      | 0.0899             | 0.0873             | 0.003                    | 0.0819             | 0.086              | -0.004                   | 0.0753             | 0.081              | -0.006                   | 0.0677             | 0.0765             | -0.009                   |
| G21EA     | 0.1004             | 0.1207             | -0.020                   | 0.1189             | 0.1463             | -0.027                   | 0.0917             | 0.1003             | -0.009                   | 0.106              | 0.1277             | -0.022                   |
| G21IP     | 0.0224             | 0.0245             | -0.002                   | 0.0215             | 0.0243             | -0.003                   | 0.0219             | 0.0249             | -0.003                   | 0.0206             | 0.0242             | -0.004                   |
| HEAVYSB11 | 0.0207             | 0.0365             | -0.016                   | 0.0241             | 0.0461             | -0.022                   | 0.025              | 0.0267             | -0.002                   | 0.019              | 0.0397             | -0.021                   |
| INV24     | 0.0441             | 0.0437             | 0.000                    | 0.0489             | 0.0486             | 0.000                    | 0.0369             | 0.0369             | 0.000                    | 0.0425             | 0.0425             | 0.000                    |
| MB16-43   | 0.0399             | 0.0372             | 0.003                    | 0.0485             | 0.052              | -0.004                   | 0.0468             | 0.047              | 0.000                    | 0.0572             | 0.0547             | 0.003                    |
| RC21      | 0.0828             | 0.0614             | 0.021                    | 0.0784             | 0.0555             | 0.023                    | 0.1165             | 0.1106             | 0.006                    | 0.0957             | 0.0971             | -0.001                   |
| RSE43     | 0.1425             | 0.2158             | -0.073                   | 0.1493             | 0.1684             | -0.019                   | 0.3843             | 0.3884             | -0.004                   | 0.158              | 0.2077             | -0.050                   |
| SIE4X4    | 0.3049             | 0.2233             | 0.082                    | 0.1698             | 0.1474             | 0.022                    | 0.3256             | 0.3293             | -0.004                   | 0.1816             | 0.1998             | -0.018                   |
| W4-11     | 0.0709             | 0.0719             | -0.001                   | 0.1553             | 0.2273             | -0.072                   | 0.1762             | 0.1084             | 0.068                    | 0.0965             | 0.152              | -0.056                   |
| YBDE18    | 0.0334             | 0.0445             | -0.011                   | 0.0483             | 0.0639             | -0.016                   | 0.0435             | 0.0466             | -0.003                   | 0.0307             | 0.0467             | -0.016                   |
|           | HF-SCAN            |                    |                          | HF-SCAN0           |                    |                          | SCAN               |                    |                          | SCAN0              |                    |                          |
| ALKBDE10  | 0.0188             | 0.0199             | -0.001                   | 0.0249             | 0.0309             | -0.006                   | 0.0207             | 0.0192             | 0.002                    | 0.0189             | 0.0222             | -0.003                   |
| BH76RC    | 0.1405             | 0.1575             | -0.017                   | 0.1435             | 0.1785             | -0.035                   | 0.1728             | 0.1885             | -0.016                   | 0.1455             | 0.1771             | -0.032                   |
| BH76      | 0.4022             | 0.4185             | -0.016                   | 0.3551             | 0.3555             | 0.000                    | 1.0282             | 1.1484             | -0.120                   | 0.3802             | 0.5661             | -0.186                   |
| DC13      | 0.0719             | 0.0717             | 0.000                    | 0.0778             | 0.0834             | -0.006                   | 0.059              | 0.0668             | -0.008                   | 0.0713             | 0.0817             | -0.010                   |
| G21EA     | 0.093              | 0.1139             | -0.021                   | 0.116              | 0.149              | -0.033                   | 0.0735             | 0.0949             | -0.021                   | 0.1033             | 0.1324             | -0.029                   |
| G21IP     | 0.0208             | 0.0243             | -0.004                   | 0.0214             | 0.0252             | -0.004                   | 0.0558             | 0.024              | 0.032                    | 0.0184             | 0.0224             | -0.004                   |
| HEAVYSB11 | 0.0154             | 0.0271             | -0.012                   | 0.021              | 0.0389             | -0.018                   | 0.0162             | 0.0175             | -0.001                   | 0.0134             | 0.0329             | -0.020                   |
| INV24     | 0.0396             | 0.0393             | 0.000                    | 0.053              | 0.053              | 0.000                    | 0.0574             | 0.0573             | 0.000                    | 0.0474             | 0.0473             | 0.000                    |
| MB16-43   | 0.0343             | 0.0353             | -0.001                   | 0.0495             | 0.0507             | -0.001                   | 0.06               | 0.0565             | 0.004                    | 0.0624             | 0.0579             | 0.005                    |
| RC21      | 0.0685             | 0.0489             | 0.020                    | 0.0671             | 0.0511             | 0.016                    | 0.1422             | 0.13               | 0.012                    | 0.1044             | 0.1104             | -0.006                   |
| RSE43     | 0.1448             | 0.2009             | -0.056                   | 0.1772             | 0.1699             | 0.007                    | 0.2713             | 0.3064             | -0.035                   | 0.0957             | 0.1718             | -0.076                   |
| SIE4X4    | 0.2919             | 0.247              | 0.045                    | 0.1579             | 0.1468             | 0.011                    | 0.3136             | 0.3189             | -0.005                   | 0.1704             | 0.19               | -0.020                   |
| W4-11     | 0.0879             | 0.0813             | 0.007                    | 0.1405             | 0.2004             | -0.060                   | 0.1793             | 0.1205             | 0.059                    | 0.093              | 0.1399             | -0.047                   |
| YBDE18    | 0.0249             | 0.0318             | -0.007                   | 0.032              | 0.0461             | -0.014                   | 0.0504             | 0.0446             | 0.006                    | 0.0207             | 0.0363             | -0.016                   |

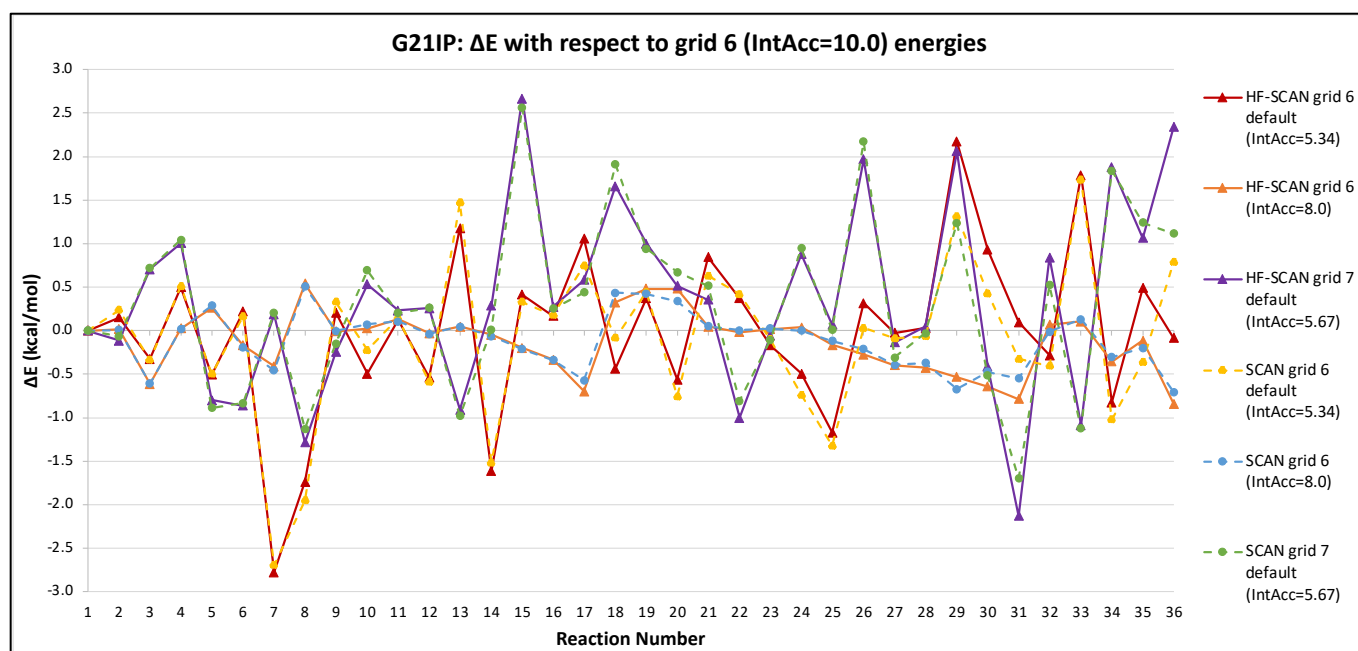

Figure S1: Energy difference (in kcal/mol) for all 36 ionization potentials of G21IP subset with different grid choices. We have used the energies evaluated using GRID6 and IntAcc=10 as our reference.

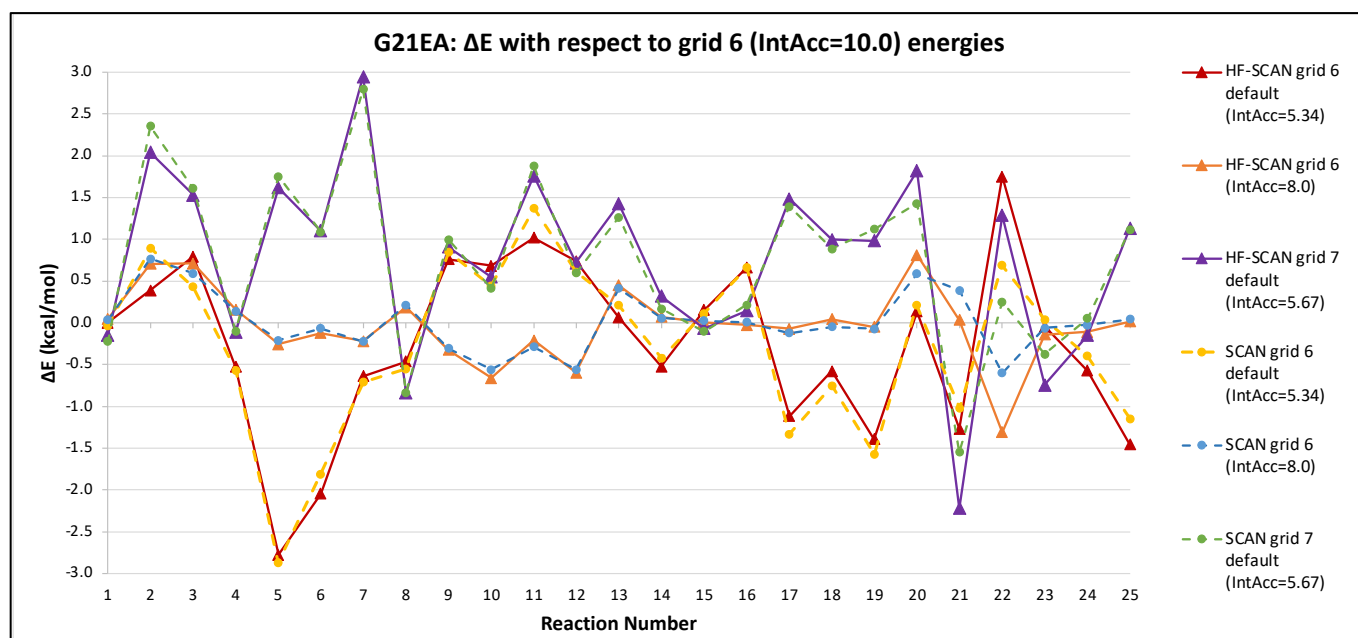

Figure S2: Energy difference (in kcal/mol) for all 25 electron affinities of G21EA subset with different grid choices. We have used the energies evaluated using GRID6 and IntAcc=10 as our reference.

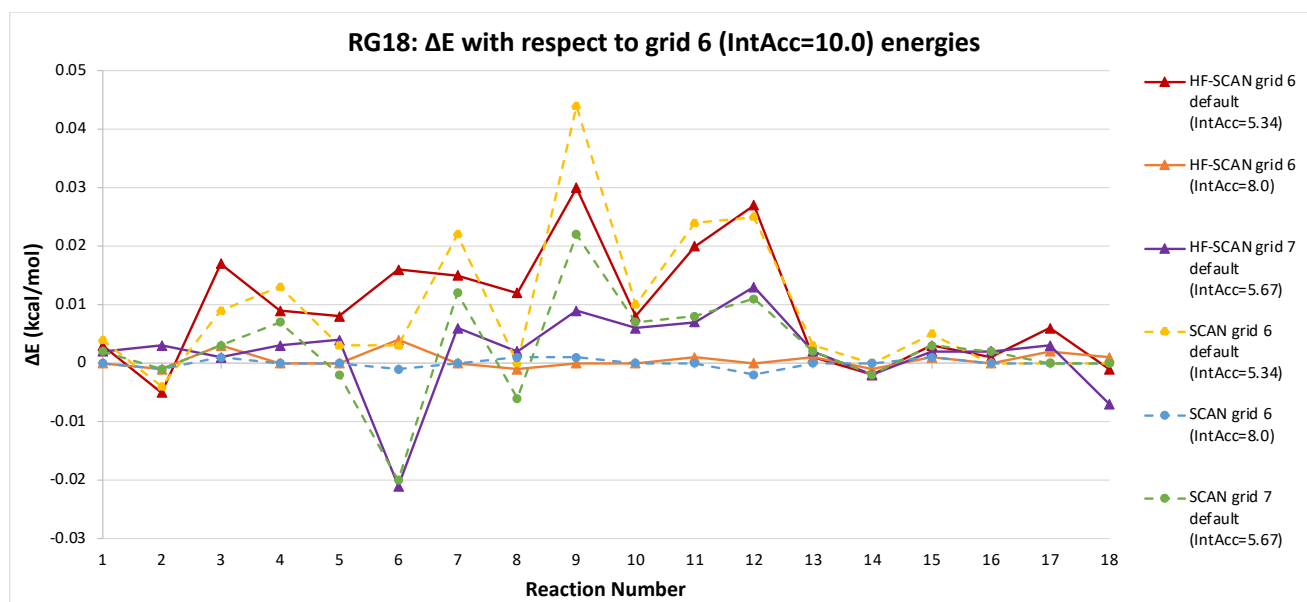

Figure S3: Energy difference for 18 interaction energies of RG18 subset with different grid choices. We have used the energies evaluated using GRID6 and IntAcc=10 as our reference.

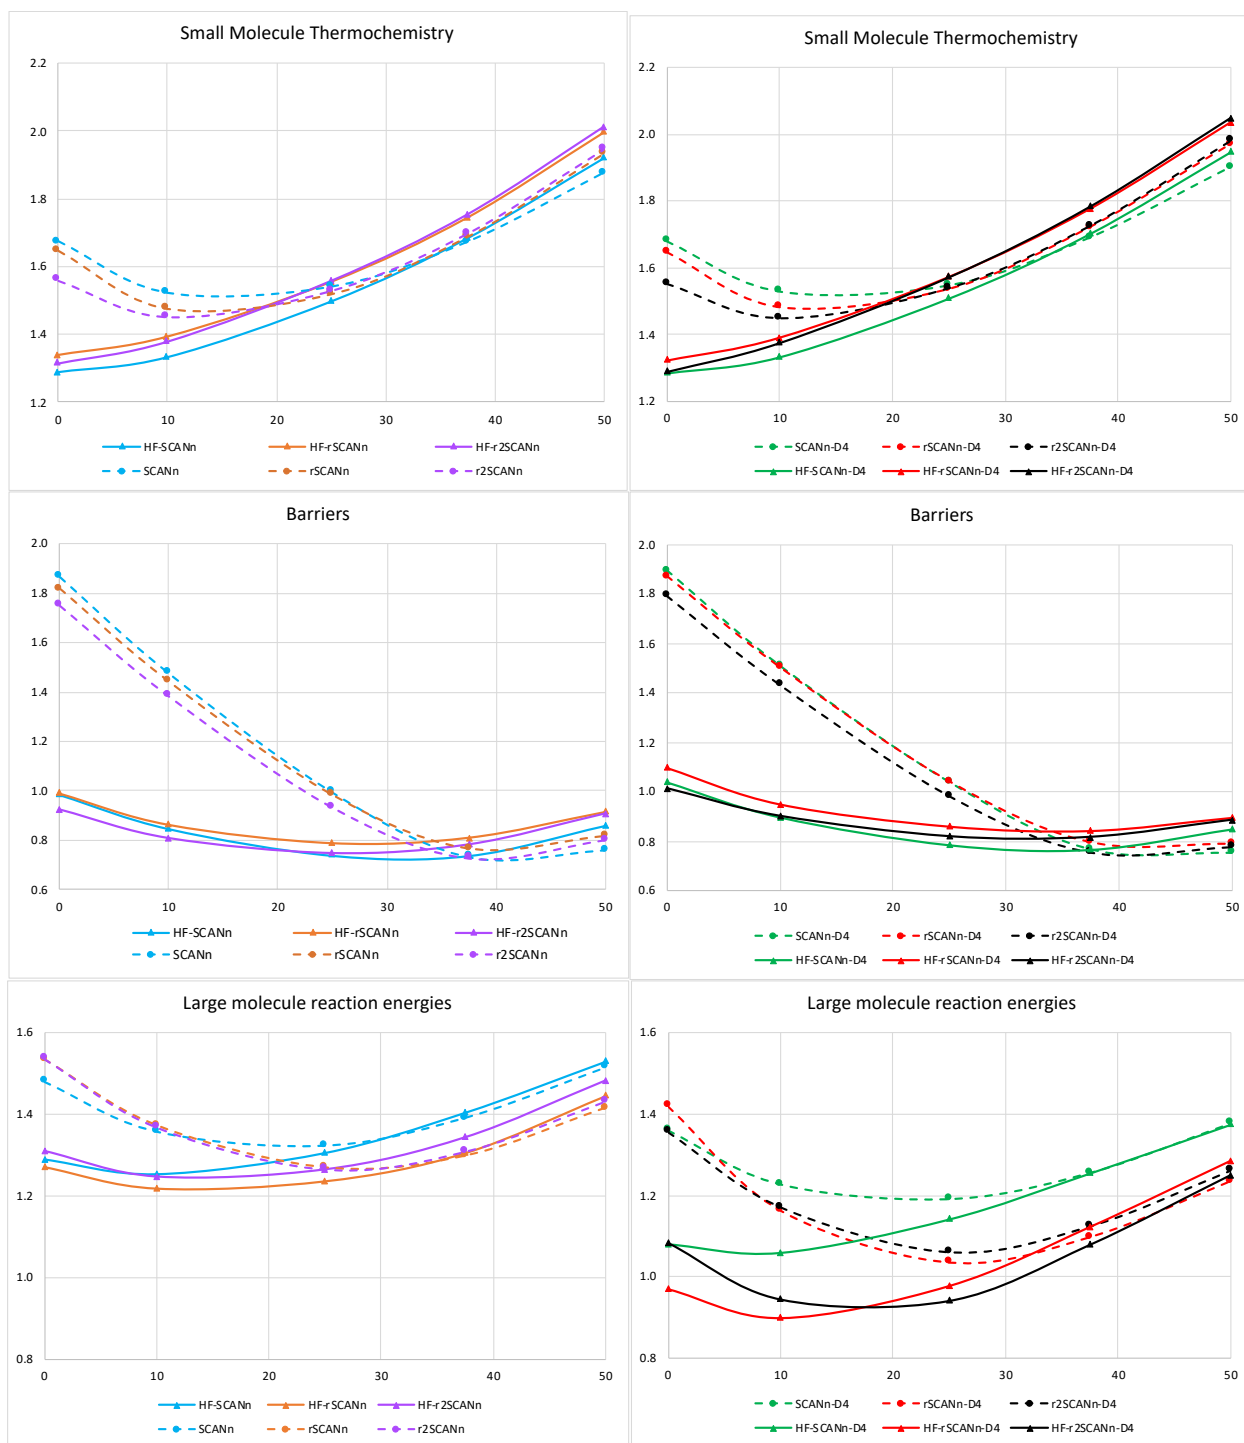

Figure S4: The trend of WTMAD2 contribution ( $\Delta\text{WTMAD2}$ ) (Y-axis) with respect to the percentage of HF exchange (X-axis) for three top-level subsets of GMTKN55 (namely, Small Molecule Thermochemistry; barrier heights and reaction energies for large systems) in case of both dispersion uncorrected (left) and corrected(right) series.



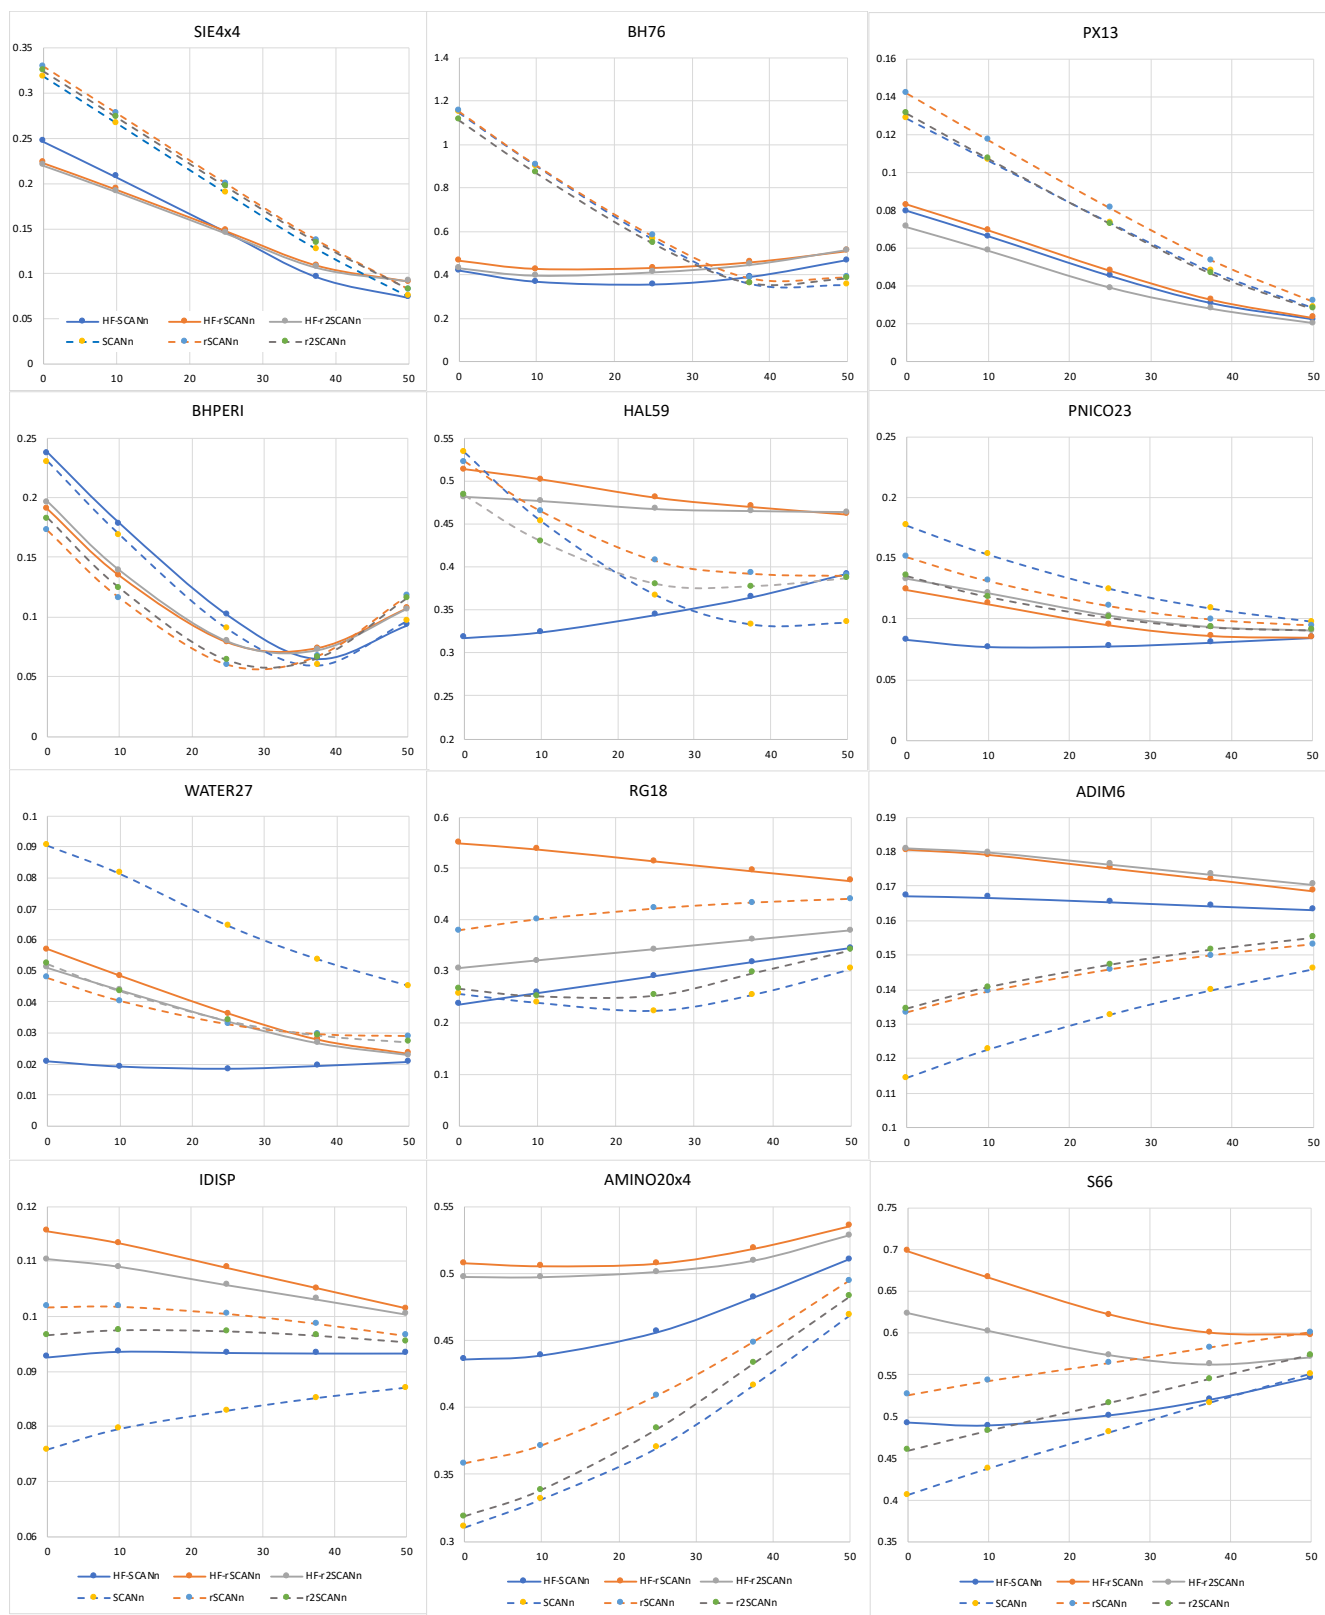

Figure S5: continued

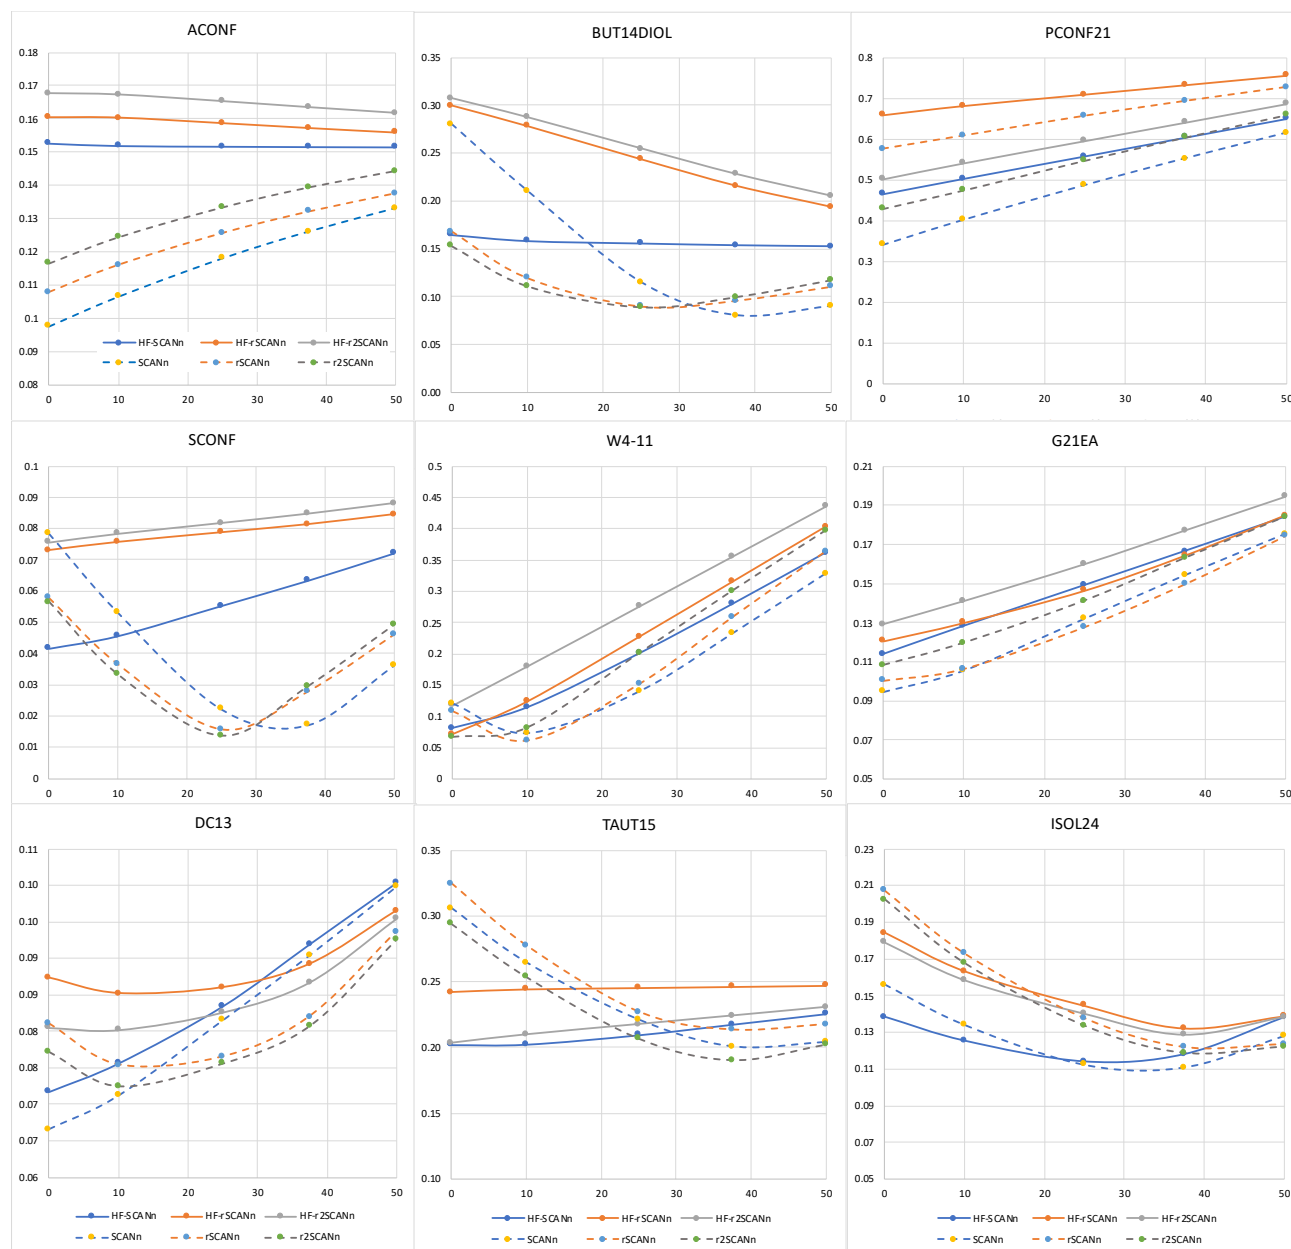

Figure S5: Dependence of WTMD2 (kcal/mol) contribution (Y-axis) on the percentage of HF exchange (X-axis) for the dispersion uncorrected HF-DFT and the self-consistent series for the individual subsets SIE4x4, WATER27, BH76, RG18, W4-11, BHPERI, S66, PX13, HAL59, PNICO23, ADIM6, IDISP, alkane conformers (ACONF), 1,4-butanediol conformers (BUT14DIOL), oligopeptide conformers (PCONF21), sugar conformers (SCONF), amino acid conformers (AMINO20X4), TAUT15, G21EA, DC13, and large-molecule isomerization (ISOL24) subsets.

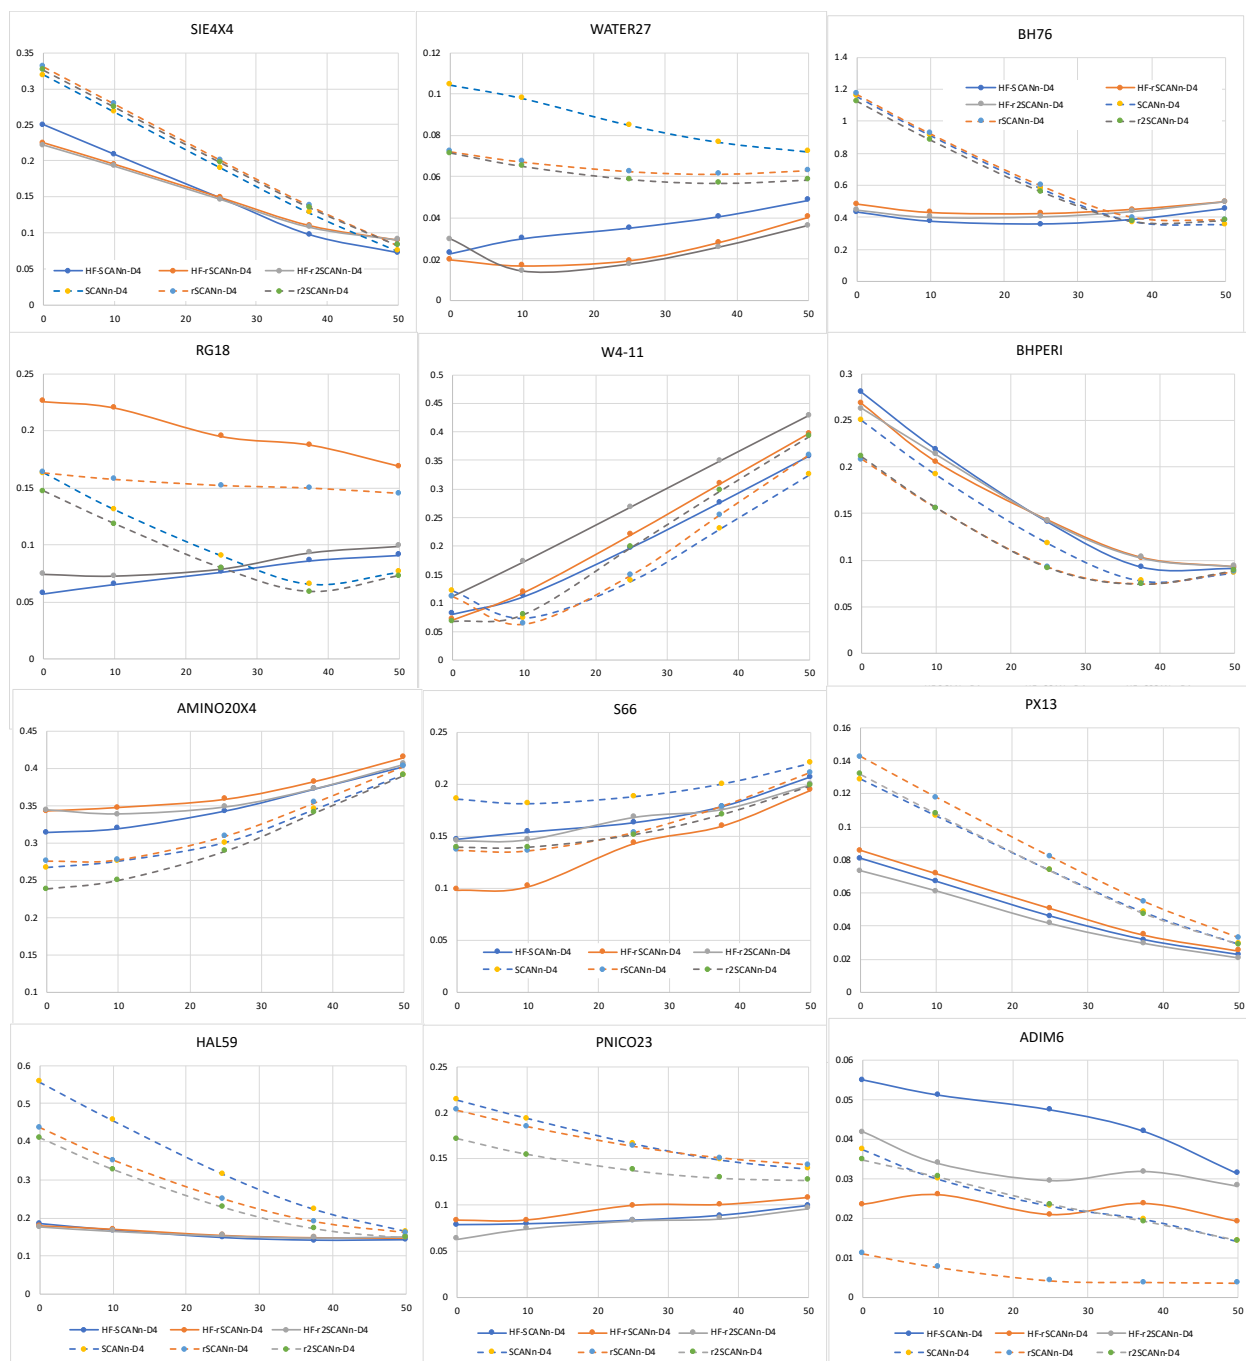

Figure S6: continued

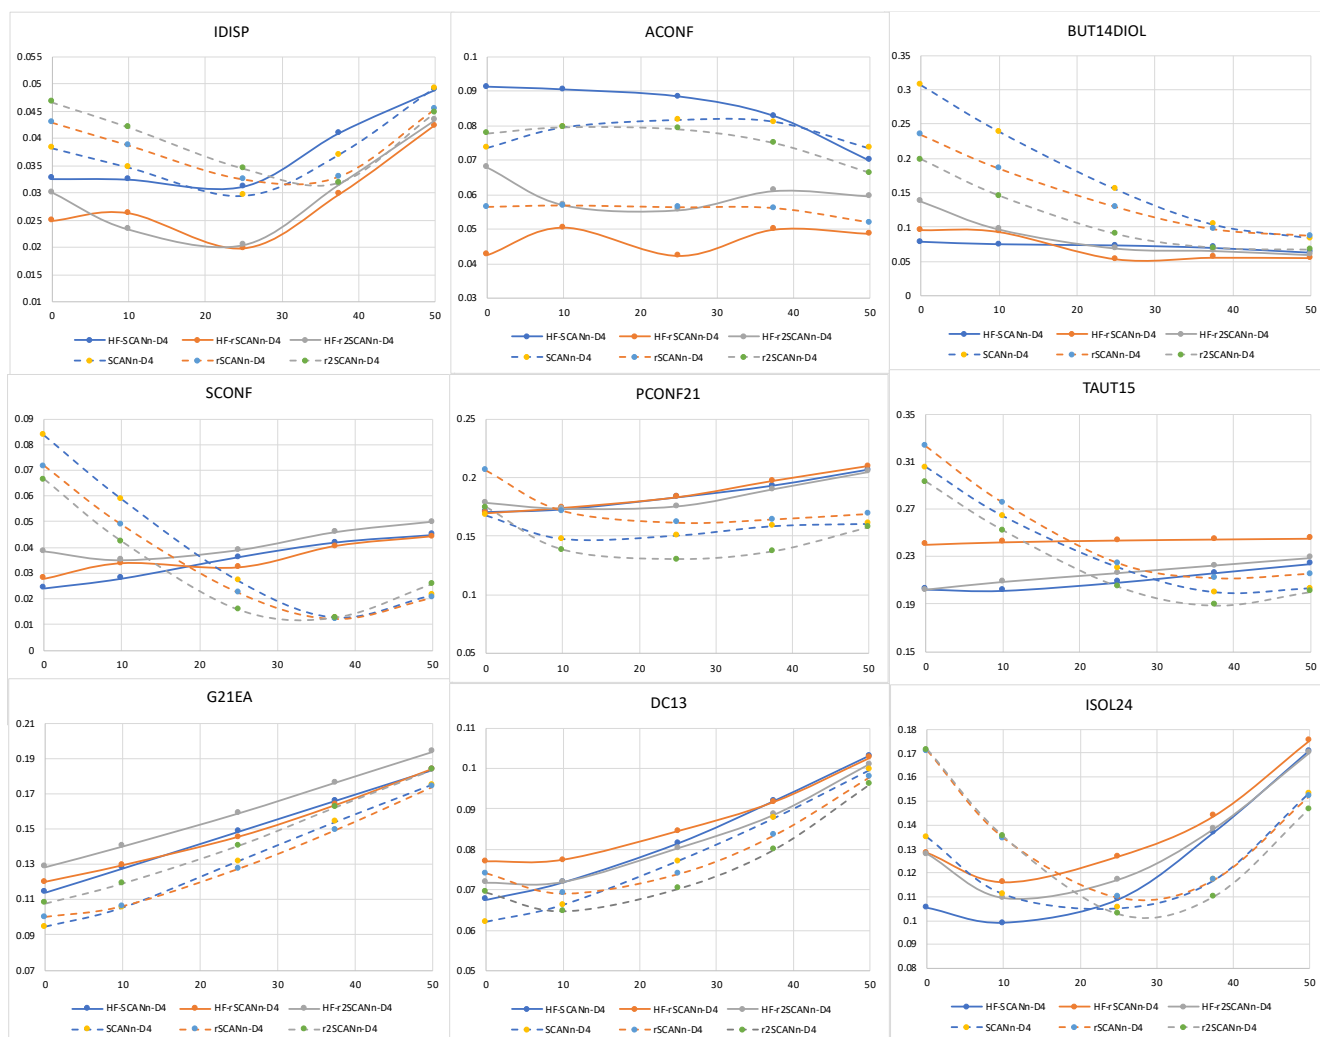

Figure S6: Dependence of WTMD2 (kcal/mol) contribution (Y-axis) on the percentage of HF exchange (X-axis) for self-consistent and HF-DFT-D4 series for the individual subsets SIE4x4, WATER27, BH76, RG18, W4-11, BHPERI, S66, PX13, HAL59, PNICO23, ADIM6, IDISP, alkane conformers (ACONF), 1,4-butanediol conformers (BUT14DIOL), oligopeptide conformers (PCONF21), sugar conformers (SCNF), amino acid conformers (AMINO20X4), TAUT15, G21EA, DC13, and large-molecule isomerization (ISOL24) subsets.

#### References:

1. Caldeweyher, E.; Ehlert, S.; Hansen, A.; Neugebauer, H.; Spicher, S.; Bannwarth, C.; Grimme, S. A generally applicable atomic-charge dependent London dispersion correction. *J. Chem. Phys.* **2019**, *150*, 154122, doi:10.1063/1.5090222.
2. Caldeweyher, E.; Bannwarth, C.; Grimme, S. Extension of the D3 dispersion coefficient model. *J. Chem. Phys.* **2017**, *147*, 034112, doi:10.1063/1.4993215.
3. Ehlert, S.; Huniar, U.; Ning, J.; Furness, J.W.; Sun, J.; Kaplan, A.D.; Perdew, J.P.; Brandenburg, J.G. r2SCAN-D4: Dispersion corrected meta-generalized gradient approximation for general chemical applications. *J. Chem. Phys.* **2021**, *154*, 061101, doi:10.1063/5.0041008.
